# Supplementary material
Source: PubMed Central journal article supplement (PMC4856442)
Supplement: NIHMS731853-supplement-supplemental_figure_1.pdf [file NIHMS731853-supplement-supplemental_figure_1.pdf]

**Figure S1: Unfolding Trajectory Contact Analysis**

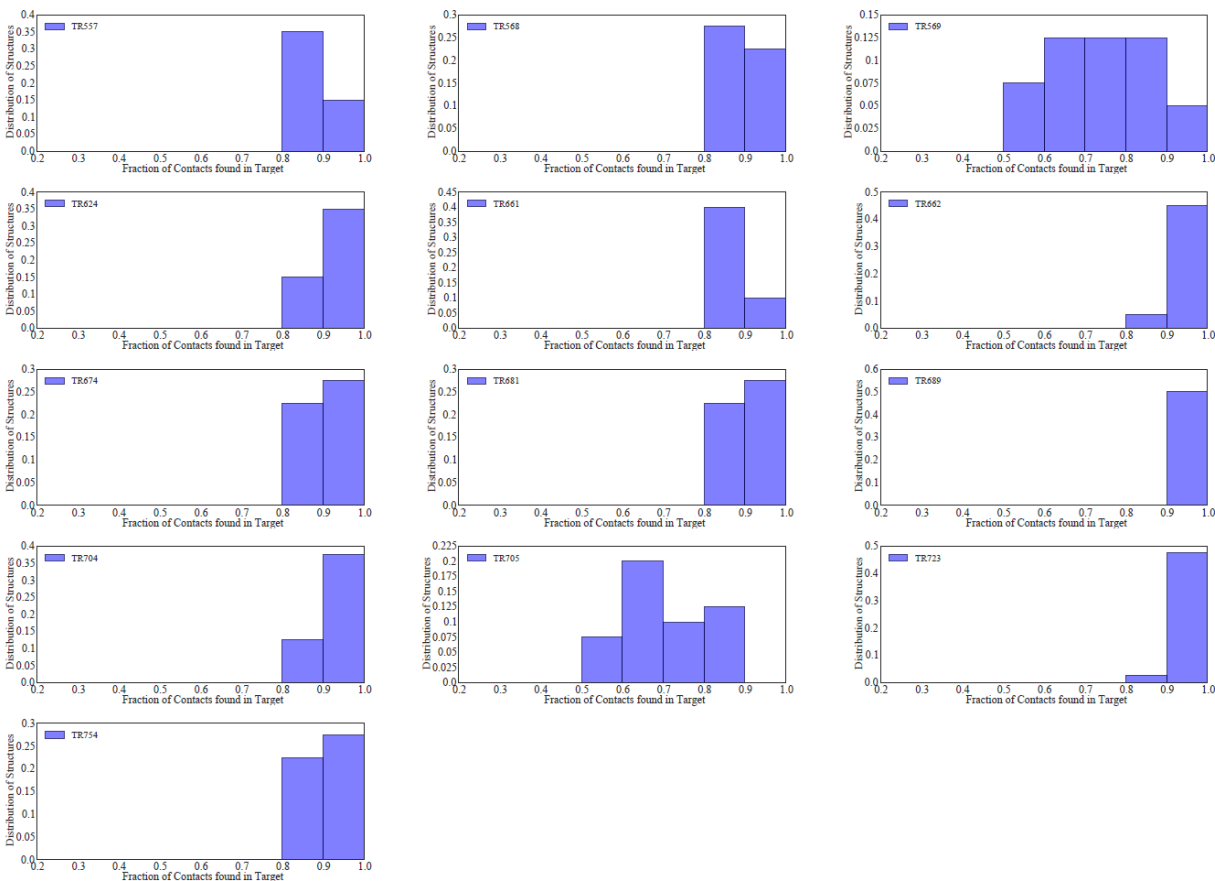

Figure S1 shows the fraction of contacts retained from the target structure for each snapshot obtained during unfolding by FRODA. We find that there are generally very few structures found in any given unfolding trajectory that retain less than 50% of the original target structure's contacts.
